# Supplementary material for: PWP1 promotes nutrient-responsive expression of 5S ribosomal RNA
Source: PubMed Central journal article supplement (PMC6262851; doi:10.1242/bio.037911), 2018-10-25
Supplement: biolopen-7-037911-s1.pdf [file biolopen-7-037911-s1.pdf]

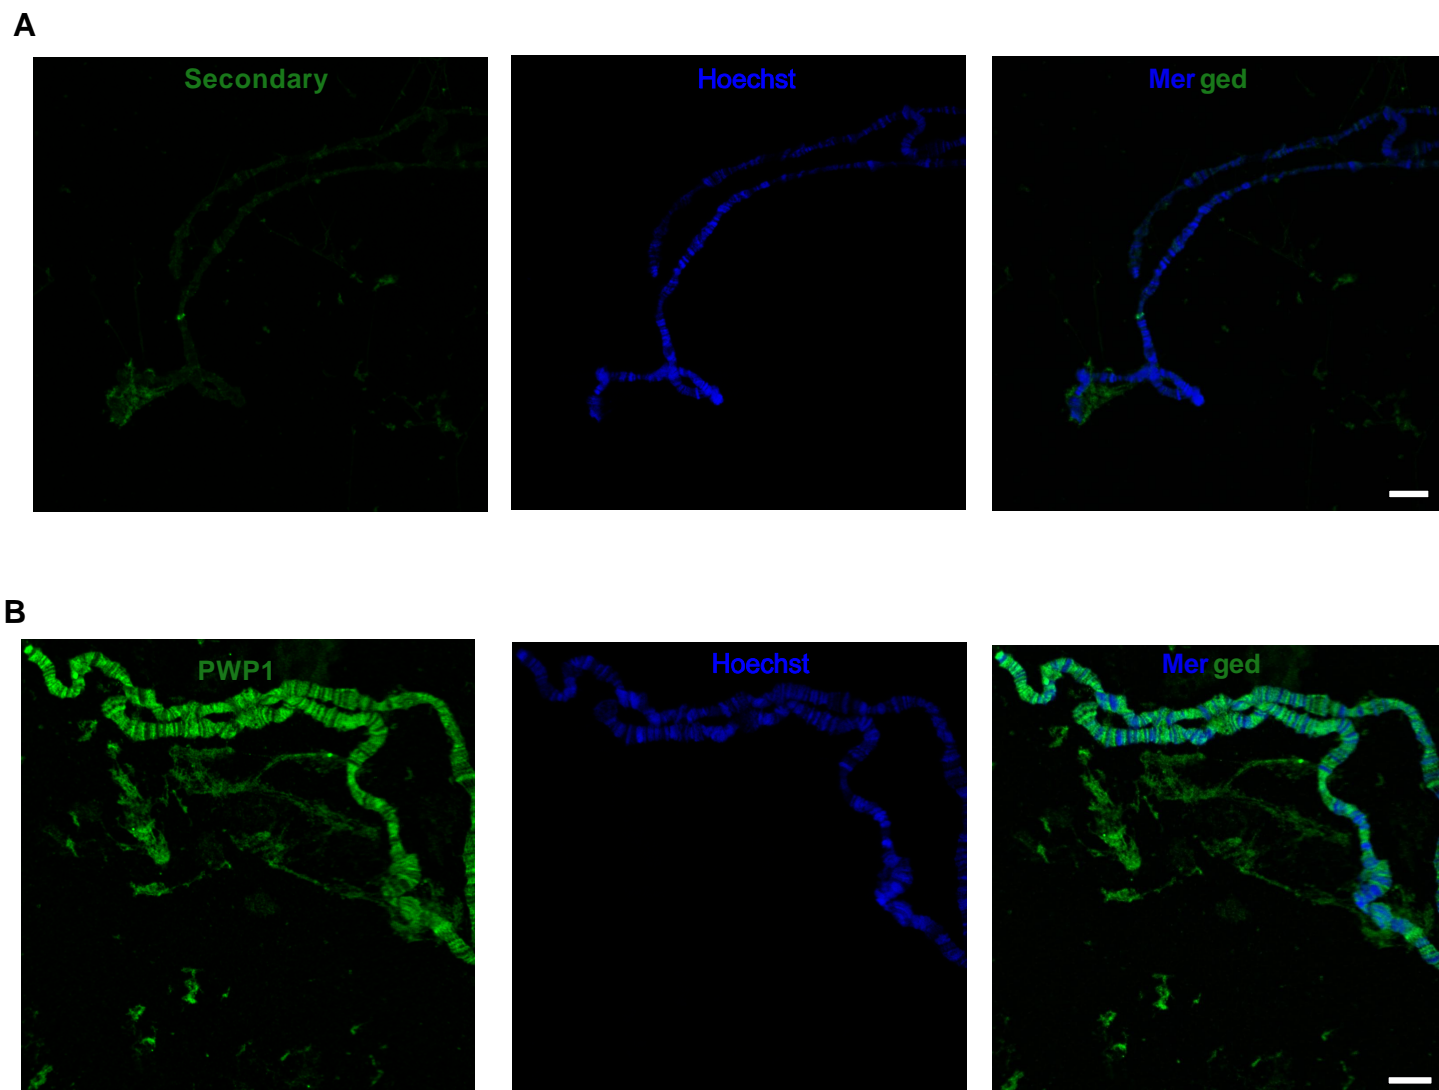

**Figure S1.** **A)** Representative image of the control polytene chromosomes stained only with the secondary antibody and Hoechst to visualize the chromatin. **B)** Immunofluorescence staining with dPWP1 antibody and Hoechst shows the specific anti-PWP1 antibody signal in multiple locations within the polytene chromosomes. Scale bar is 10  $\mu$ m.

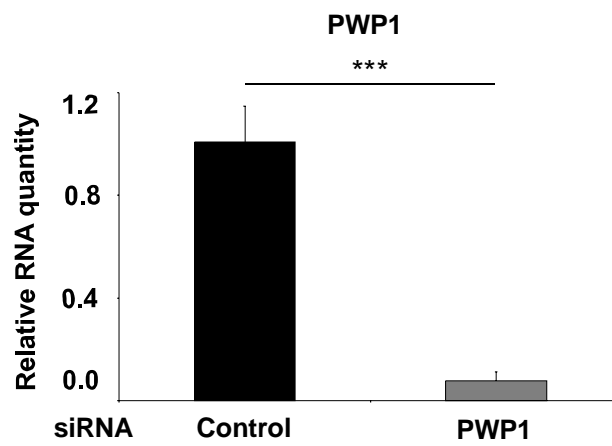

**Figure S2.** Quantitative RT-PCR analysis of PWP1 expression in U2OS cells following PWP1 depletion by siRNA. Human GAPDH was used as a reference gene. n=3. Error bars represent standard deviation. \*\*\* p<0.001 (Student's t-test).
